# Supplementary material
Source: PubMed Central journal article supplement (PMC6451065)
Supplement: BPH-176-1122-s002.pdf [file BPH-176-1122-s002.pdf]

## **UC Supporting information**

### **Methods**

#### **Peptide treatment in HBE cells and confocal microscope**

A human bronchial epithelial (HBE) cell line was obtained from Dr. Reen Wu, University of California, Davis. HBE cells were cultivated in BEGM media (BEBM media supplemented with 0.5 ng/mL hEGF, 5 µg/mL insulin, 0.5 µg/mL hydrocortisone, 0.5 µg/mL epinephrine, 50 µg/mL gentamycin, 50 µg/mL amphotericin B, 6.5 ng/mL triiodothyronine, 10 µg/mL transferrin, 0.13 mg/mL bovine pituitary extract and 100 µg/mL penicillin, streptomycin, and fungizone (all supplied by Lonza). HBE cells ( $2 \times 10^5$  cells/mL) were seeded on a 4-well chamber slide (Thermo Fisher Scientific™ Nunc™) for 24 h. Cell were then washed with HBSS and incubated with 100 nmol MPS-FITC, A-MPS-FITC, and D-MPS-FITC at 37°C for 5 min. After peptide incubation, the cell nuclei were stained with 4',6-diamidino-2-phenylindole (DAPI) and subjected to confocal microscopy. NHBE cells were visualized and images were captured using the Leica TCS SP2/SP8X confocal microscope (Heidelberg, Germany).

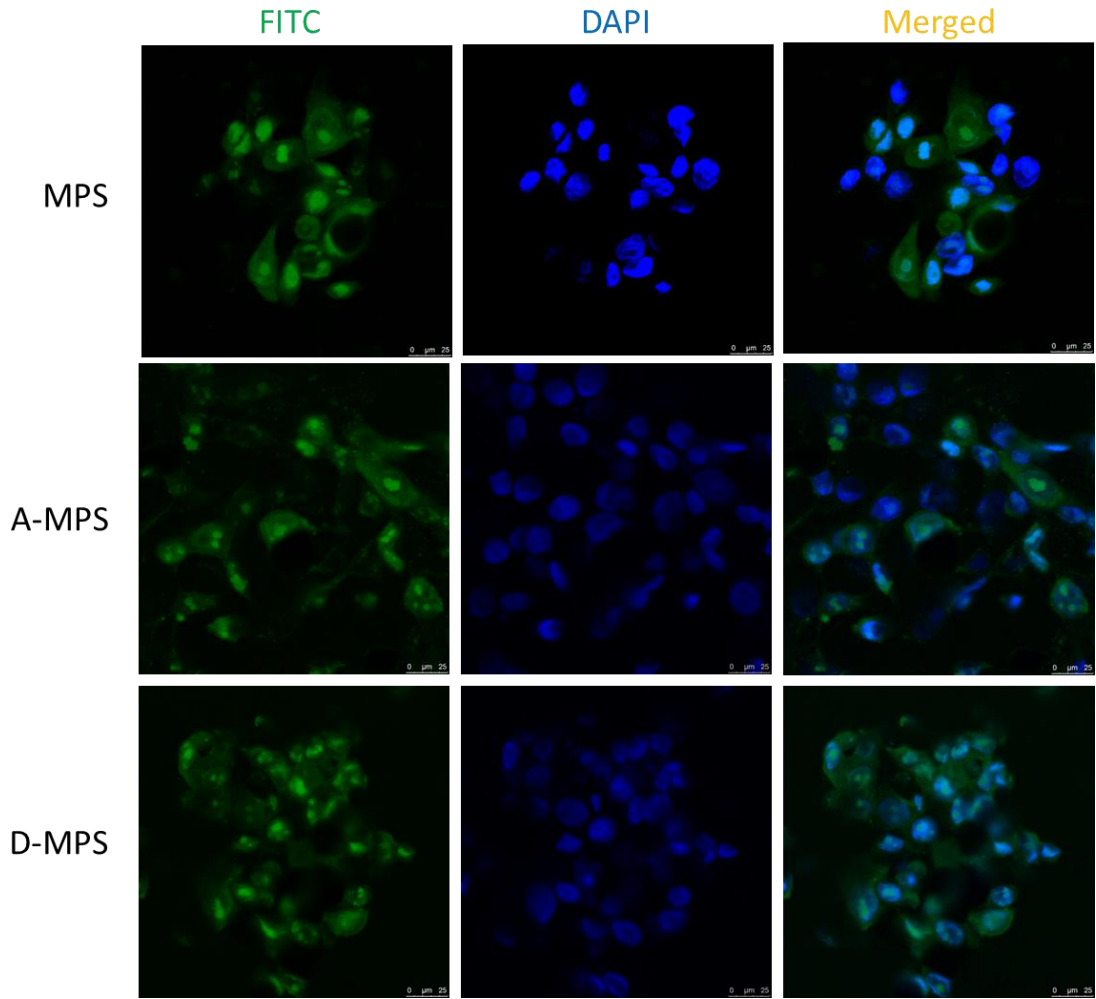

Figure S1. Intracellular localization of MPS, A-MPS, and D-MPS peptides in NHBE cells. NHBE cells were seeded in a chamber slide for 24 h and then incubated with 100 nmol MPS-FITC, A-MPS-FITC, and D-MPS-FITC at 37°C for 5 min. The cells were washed thrice with 1 ml HBSS and then subjected to confocal microscopy. Nuclei were stained with DAPI which showed blue fluorescence. Green fluorescence indicates different MPS peptides. Scale bar: 25  $\mu\text{m}$ , N = 5.

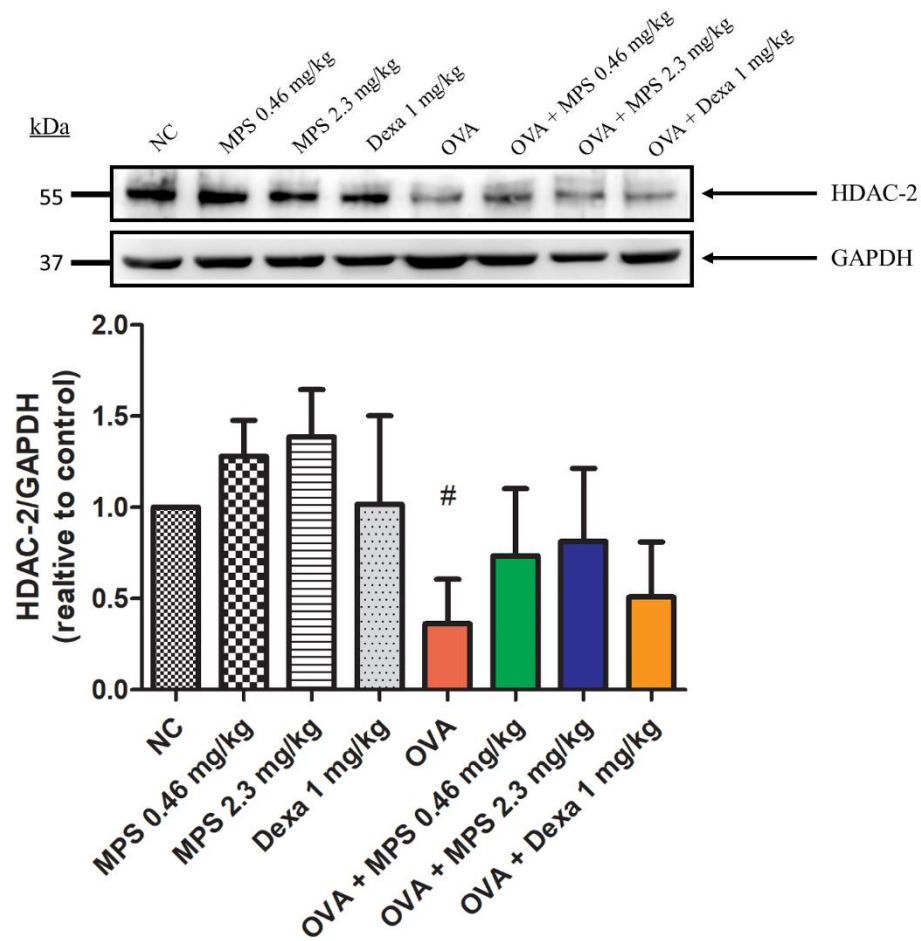

Figure S2. The effect of HDAC-2 protein expression in a murine model of steroid-resistant like asthma. The lung proteins were subjected to western blot analysis to assess the expression of HDAC-2 and GAPDH. The proteins were quantified using Image J. Data are expressed as the mean  $\pm$  S.D. (n = 5). #  $P < 0.05$ , as compared with the NC group.

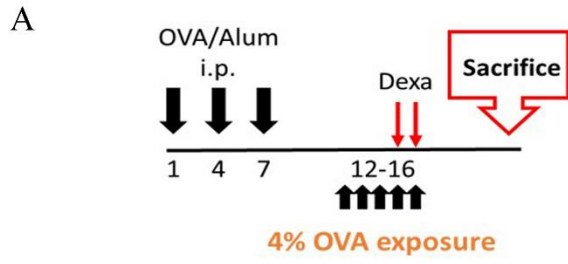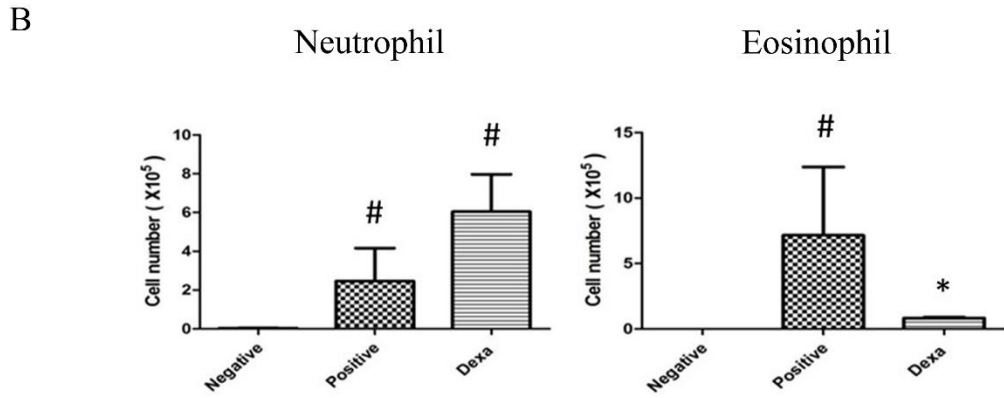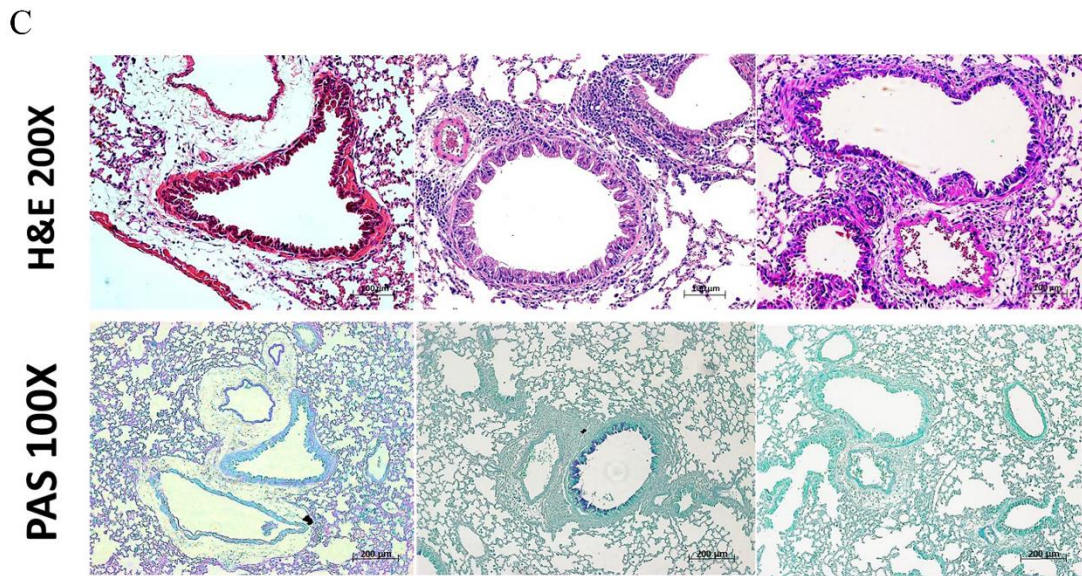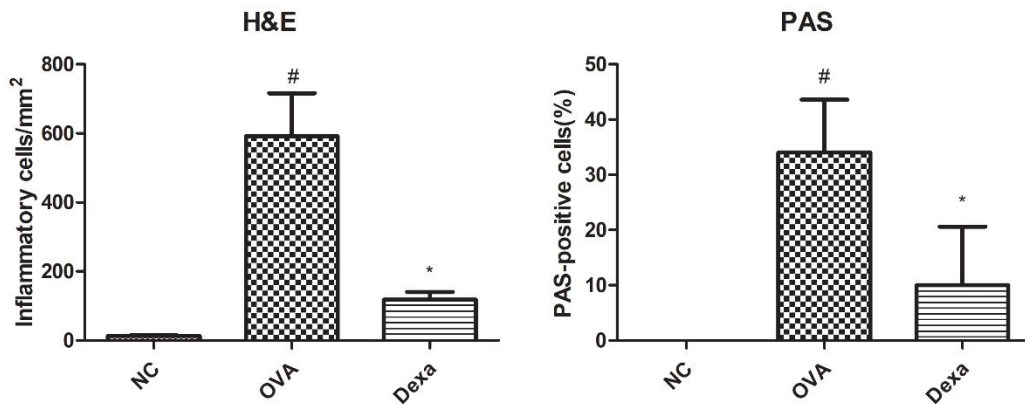

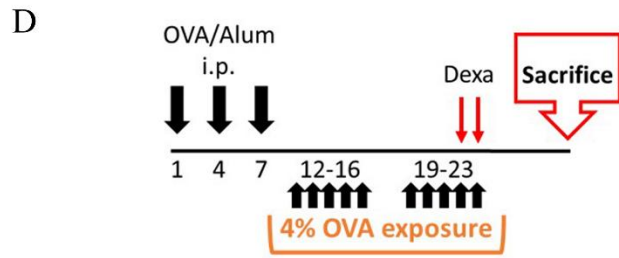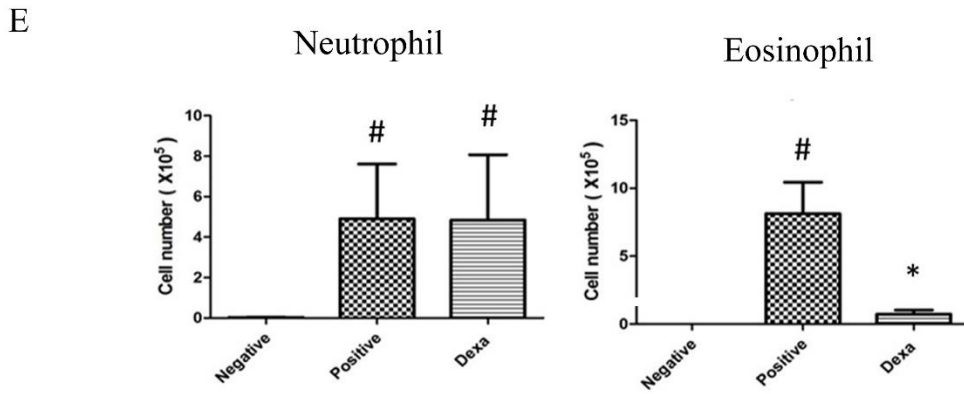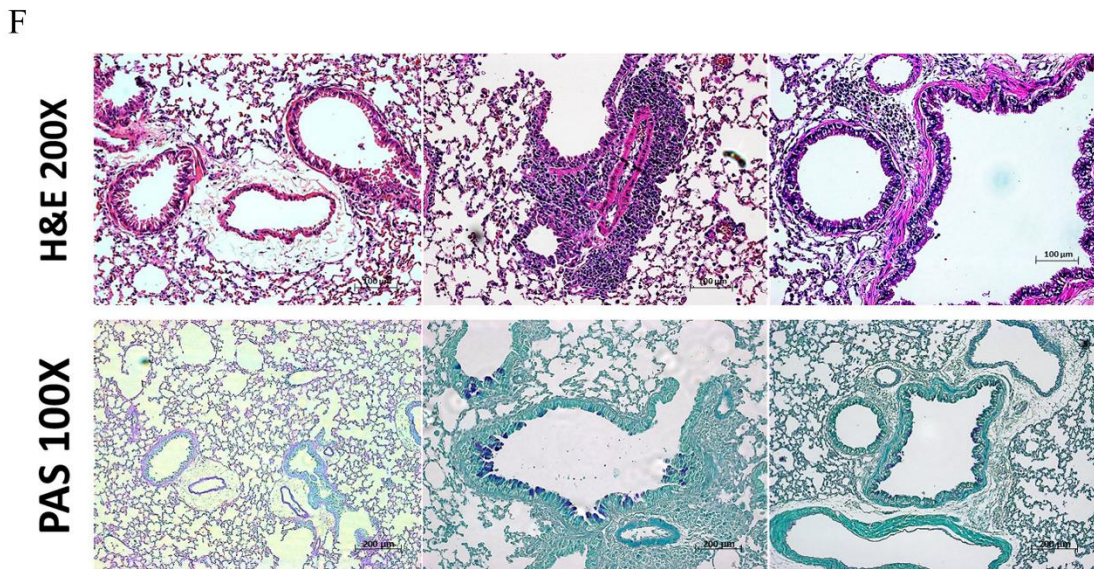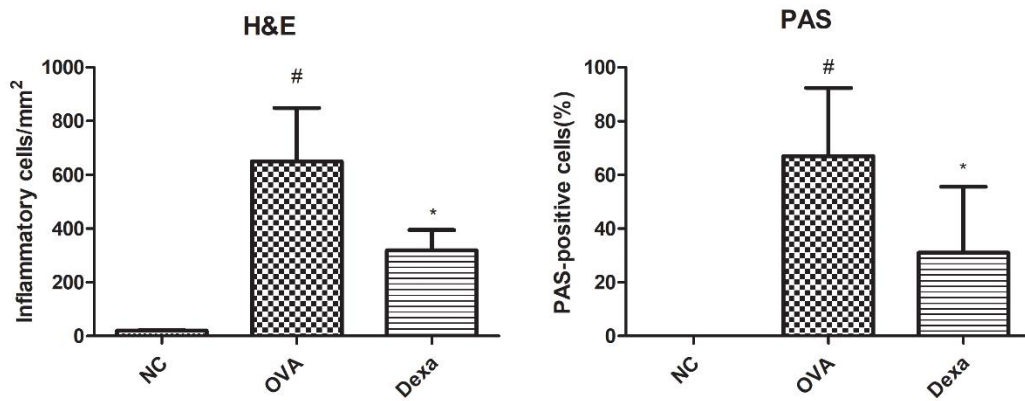

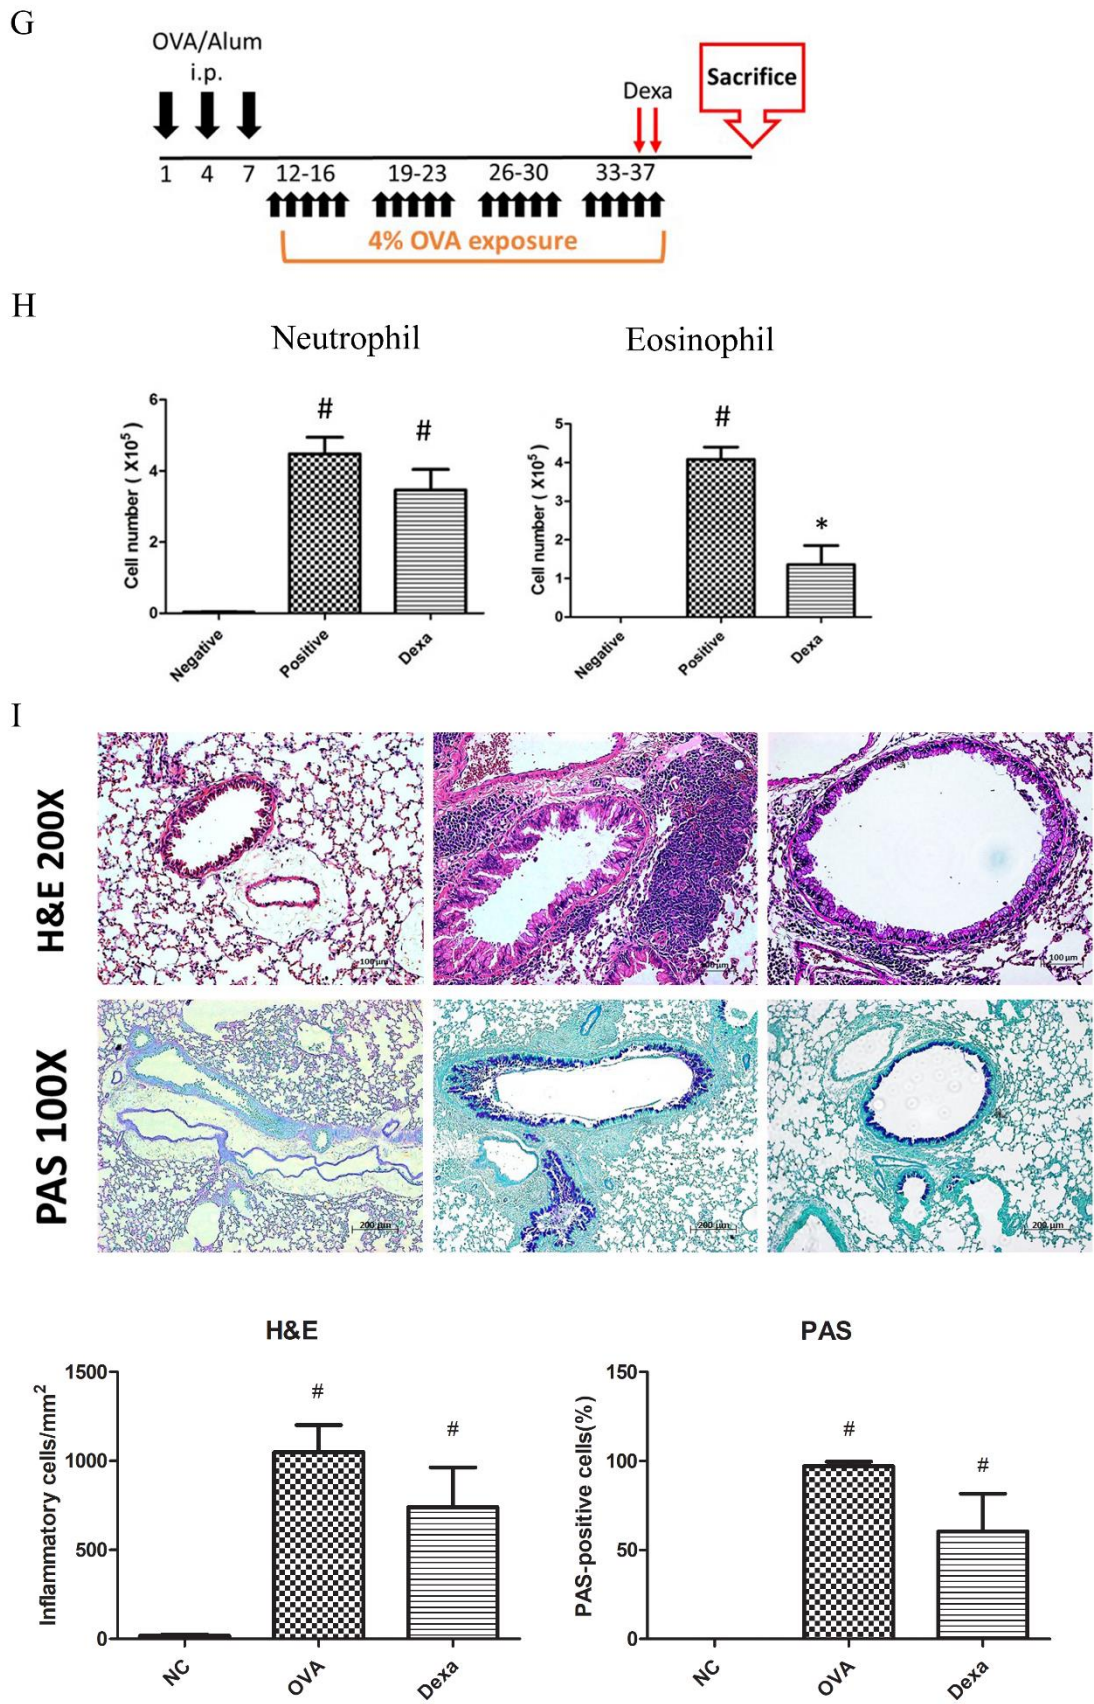

Figure S3. Pulmonary inflammation and pathology at different times of OVA exposure.

(A, D, G) Mice at 6 weeks of age were sensitized with OVA-alum. On day 12, the mice were exposed to PBS or 5 mL 4 % OVA for five days per week for 1, 2, and 4 weeks, respectively. (B, E, H) Mice were intratracheally instilled with 1 mg/kg of dexamethasone twice, at 24 h and 48 h before dissection. On day 17, 24, and 38, the mice were sacrificed and differential cell counts in the BAL were assessed by May-Giemsa staining. (C, F, I) Lungs were subjected to hematoxylin and eosin (H&E), periodic acid–Schiff (PAS), and Masson’s trichrome (MT) staining. High magnification (bar represents 100  $\mu$ m for H&E and MT, 200  $\mu$ m for PAS). Data are expressed as mean  $\pm$  S.D. (n  $\geq$  5). #  $P < 0.05$ , compared to the NC group.; \*  $P < 0.05$  compared to OVA group.

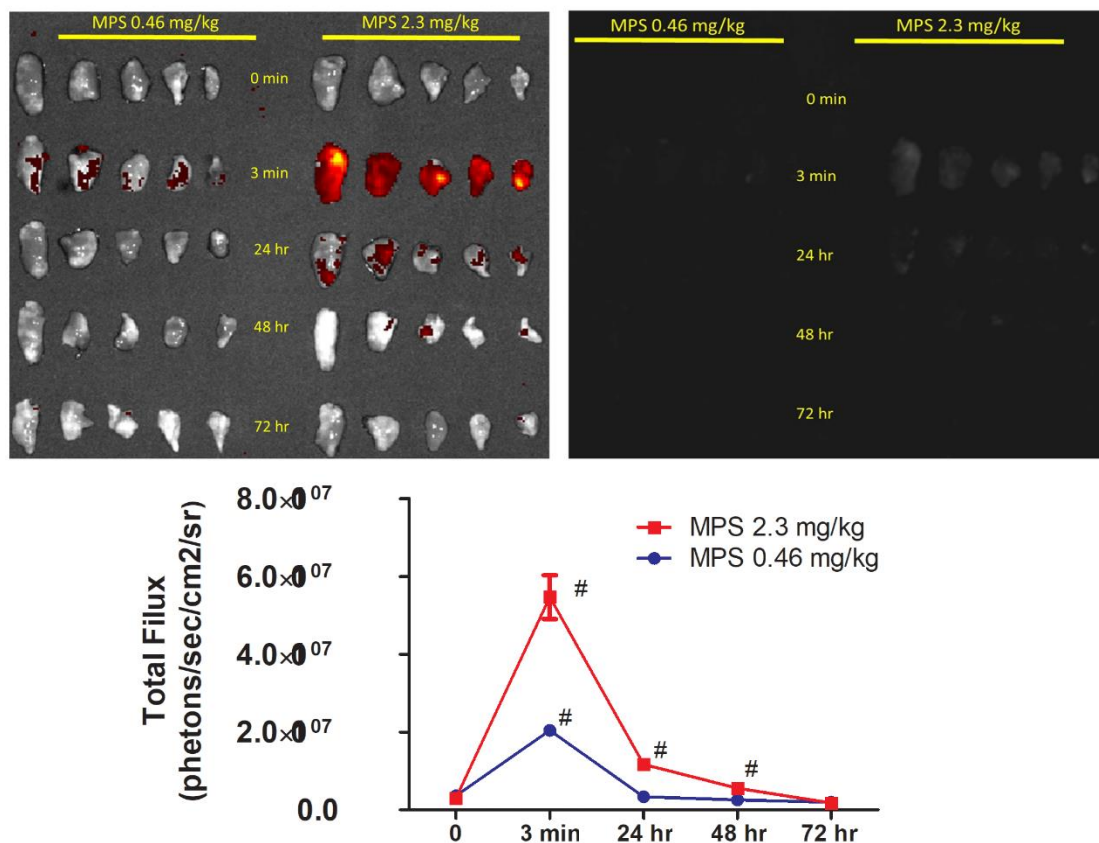

Figure S4. Retention time of MPS peptides in the airway. MPS-FITC peptides (0.46 mg/kg and 2.3 mg/kg) were intratracheally instilled in mice at different time points (0 min, 3 min, 24 h, 48 h, and 72 h), and the lungs were then dissected and observed under an IVIS System to measure and quantify the fluorescence intensity. Data are expressed as mean  $\pm$  S.D. ( $n \geq 5$ ). #  $P < 0.05$ , as compared with the NC.



## BALF

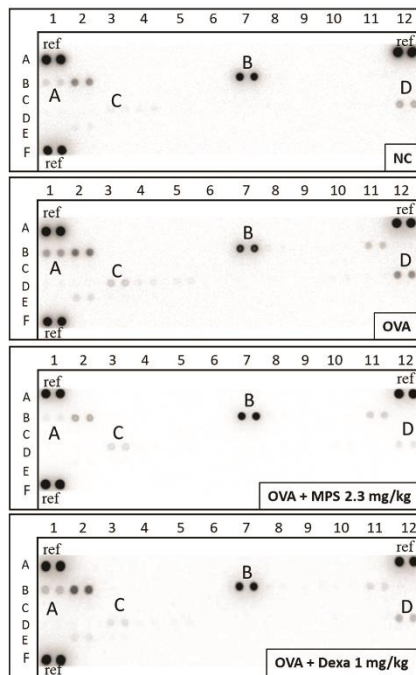

## BALF

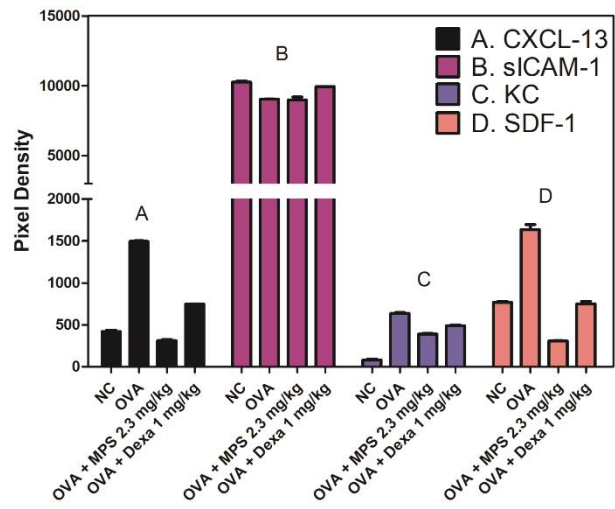

Figure S5. Cytokine expression after MPS treatment using a cytokine array in a murine model of steroid-resistant asthma. BAL fluid (BALF) was analyzed with a mouse cytokine array to screen for 40 cytokines, chemokines, and complement and acute-phase proteins in the BAL. Pixel density plots of chemokine (C-X-C motif) ligand (CXCL)-13 (A), soluble intercellular adhesion molecule-1 (sICAM-1) (B), KC (C) and stromal cell-derived factor (SDF)-1 (D) in BALF, and their quantification using Image J.

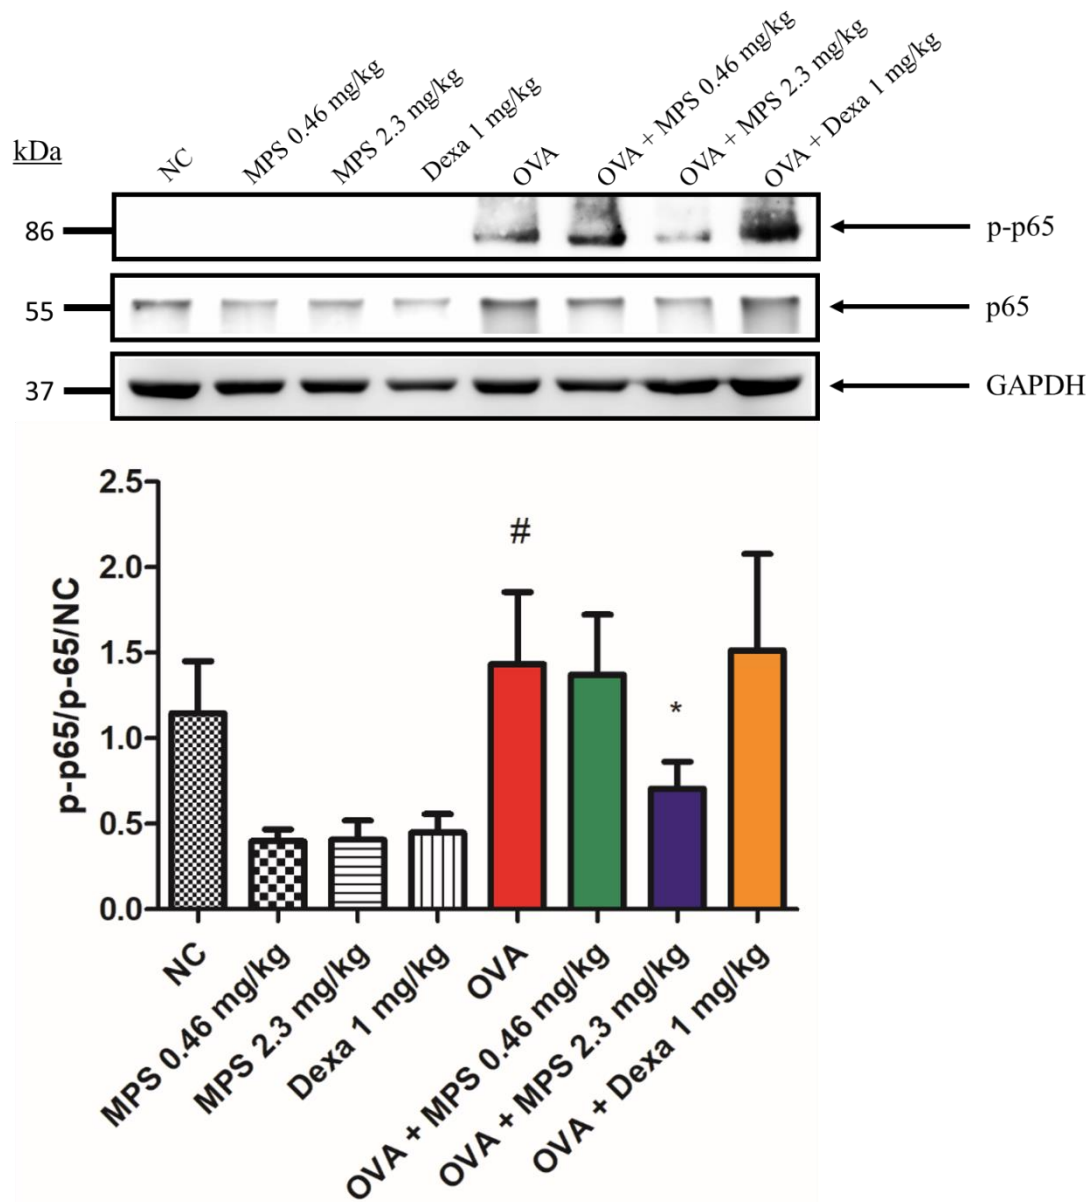

Figure S6. The effect of phospho-p65 and p-65 in mice with steroid-resistant like asthma. Lung proteins were subjected to western blot analysis to assess the expression of p-p65, p-65, and GAPDH. The proteins were quantified using Image J. Data are expressed as the mean  $\pm$  S.D. (n = 5). <sup>#</sup>  $P < 0.05$ , as compared with the NC group. <sup>\*</sup>  $P < 0.05$ , as compared with the OVA group.

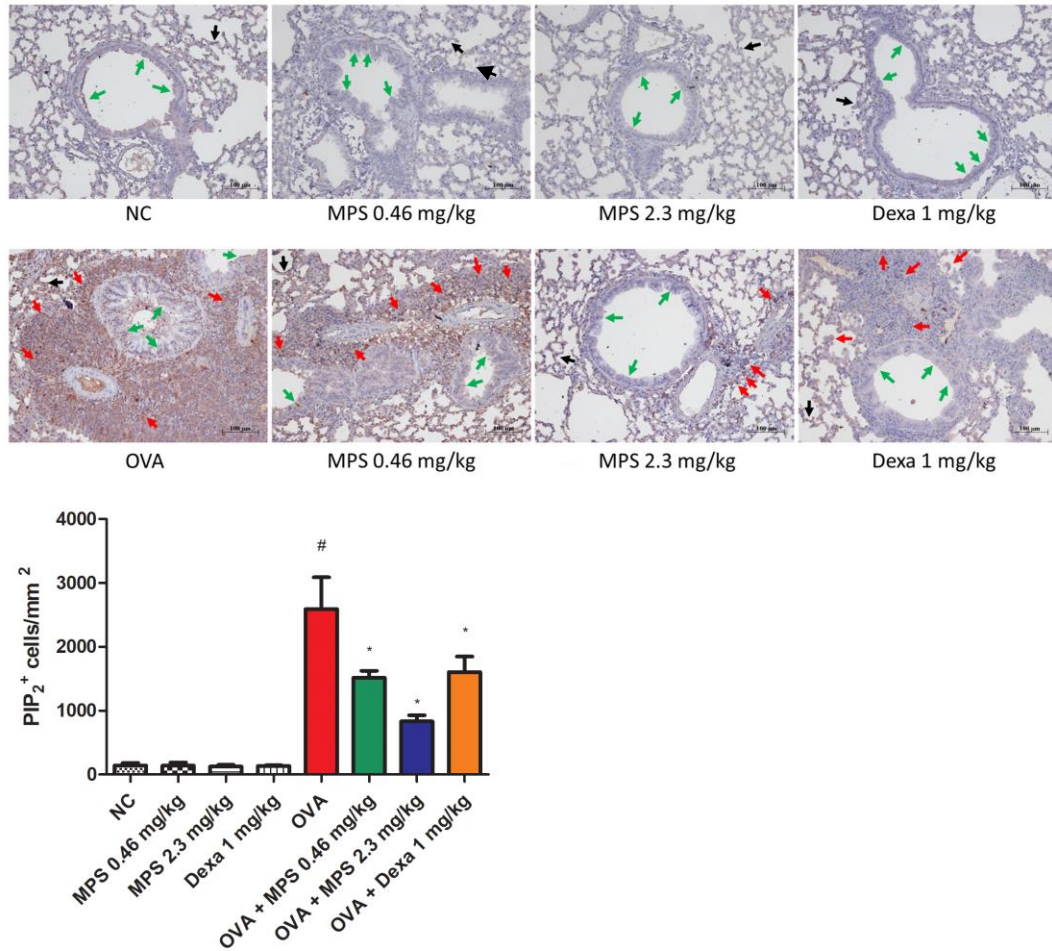

Figure S7. The effect of phosphatidylinositol 4,5-biphosphate (PIP<sub>2</sub>) levels on the airways of OVA-immunized mice. Mice at 6 weeks of age were sensitized with OVA/alum, as described in **Figure 1B**. Paraffin sections of mouse airway tissues were deparaffinized and IHC stained with PIP<sub>2</sub> antibody (green arrows represent bronchial epithelial cells, black arrows represent alveolar epithelial cells, and red arrows represent for inflammatory cells). High magnification (bar represents 100  $\mu$ m).
